# Supplementary figures and images for: Induction of inner ear hair cell-like cells from Math1-transfected mouse ES cells
Source: PubMed Central journal article supplement — Cell Death Dis. 2013 Jul 4;4(7):e700–. doi: 10.1038/cddis.2013.230 (PMC3730404; doi:10.1038/cddis.2013.230), 2013-07-04

**Figure S1.**

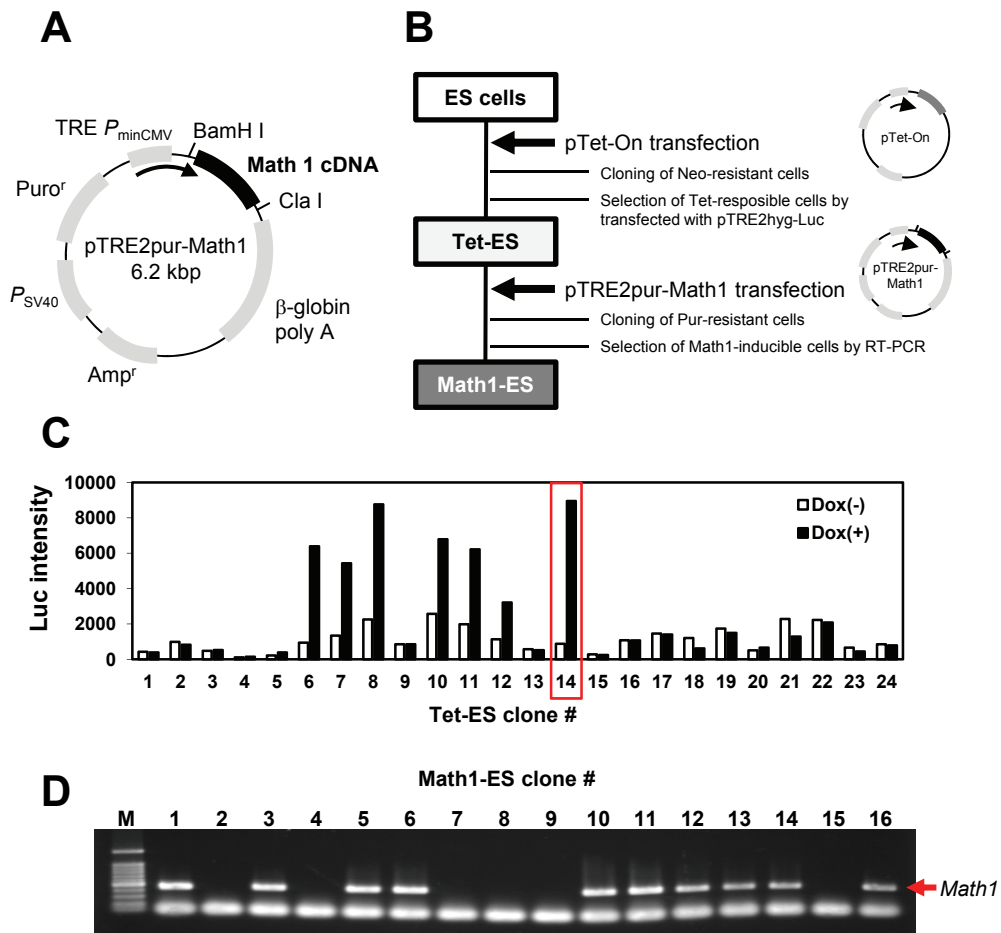

Supplement: cddis2013230x1.pdf [file cddis2013230x1.pdf]

**Figure S2.**

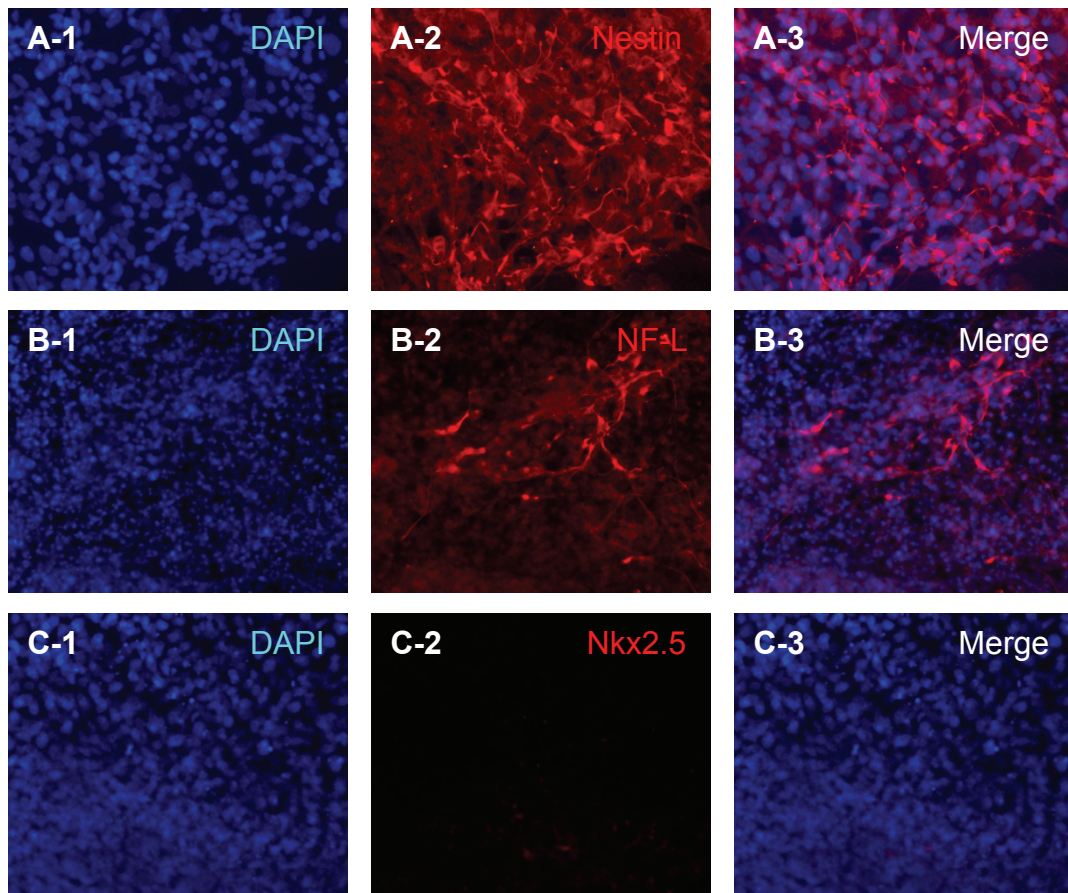

Supplement: cddis2013230x2.pdf [file cddis2013230x2.pdf]

**Figure S3.**

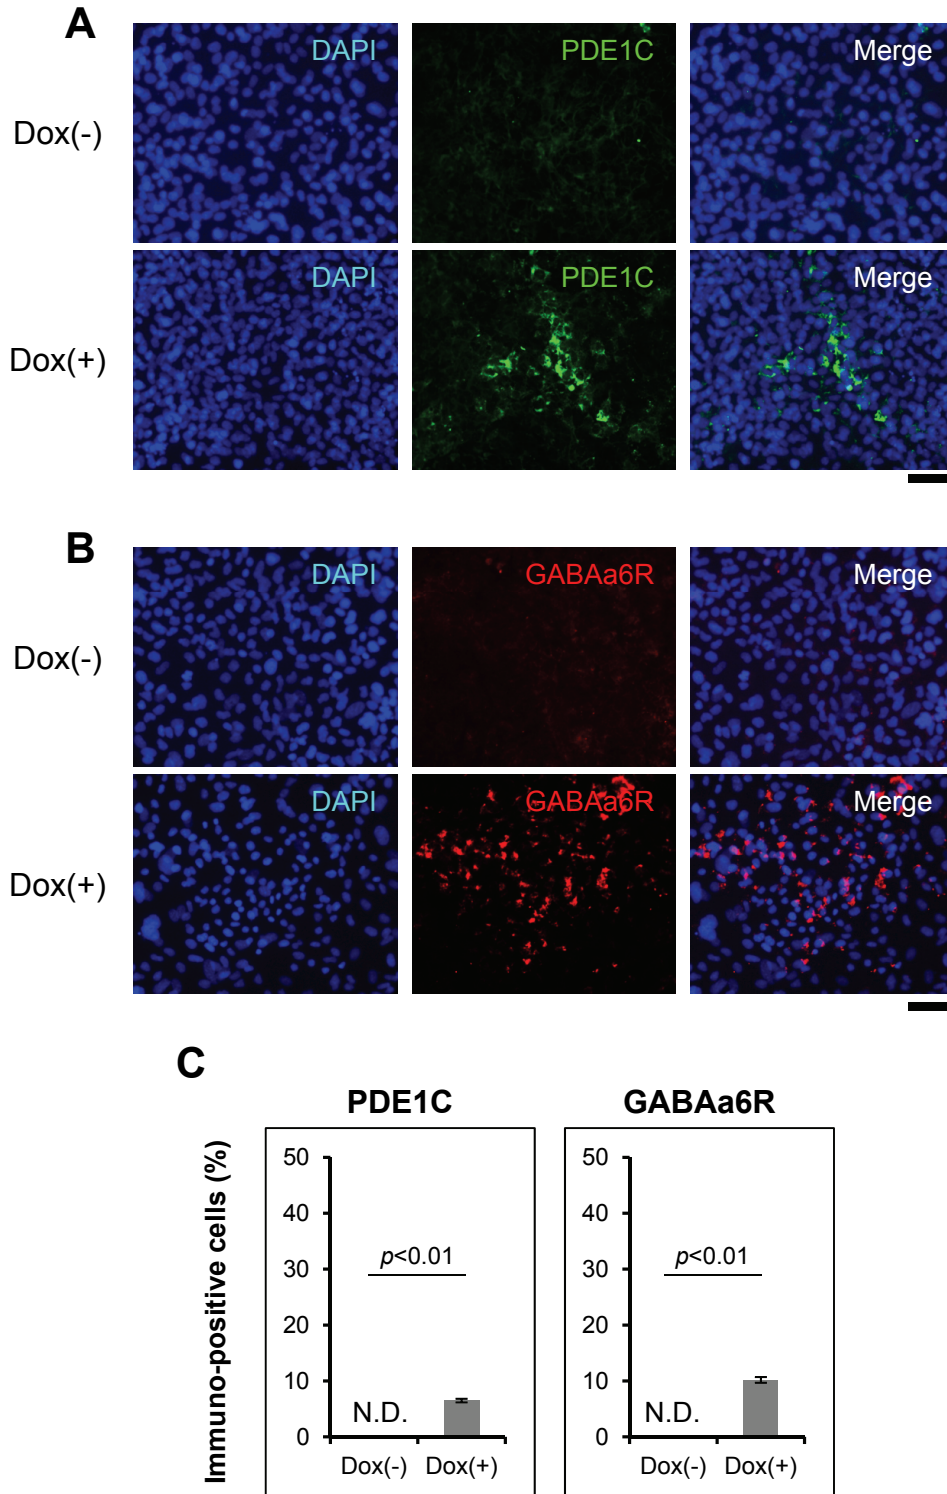

Supplement: cddis2013230x3.pdf [file cddis2013230x3.pdf]

Figure S5.

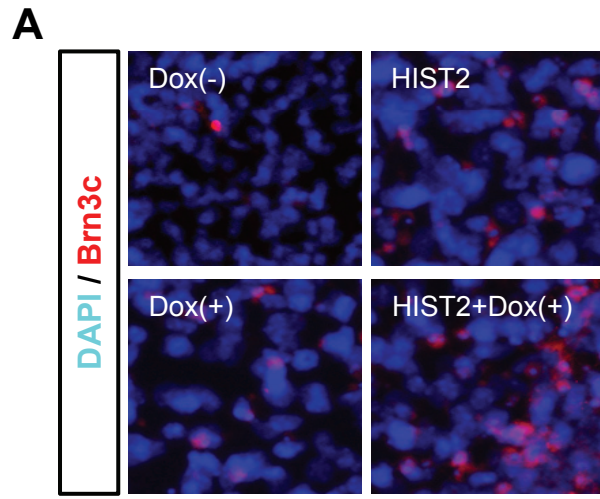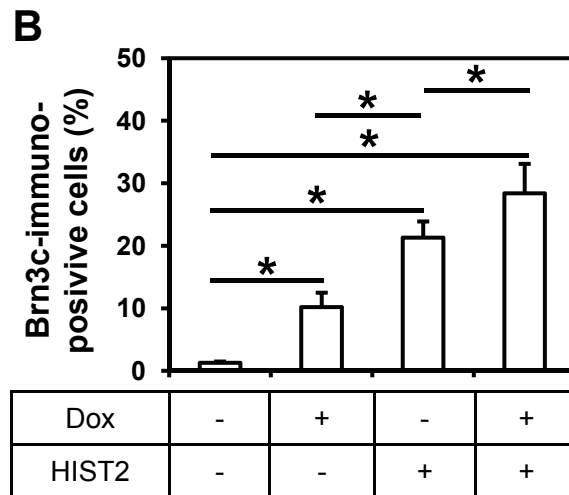

Supplement: cddis2013230x5.pdf [file cddis2013230x5.pdf]
